# Supplementary material
Source: publisher figshare collection journal article supplement (https://sage.figshare.com/ndownloader/files/22107759)
Supplement: Supplementary file 1 [file 22107759]

**Supplemental Table 1: ICD9, ICD10, and CPT Codes Used for Data Search**

|  | **ICD9 Codes** | **ICD10 Codes** | **CPT Codes** |
| --- | --- | --- | --- |
| **Cleft Palate** | 749.23, 749.24, 749.03, 749.04, 525.8, 749.0, 749.2, 749.25, 526.89, 749.02, 749.11, 749.12, 749.21, 749.22, 749.01 | Q35.9, Q35.3, Q35.5, Q37.5, Q37.1, Q37.3, Q37.4, Q37.0, Q37.2 |  |
| **VPI** | 784.43, 528.9, 478.29 | R49.21, K13.79, J39.2, Q38.8 |  |
| **Speech Surgery**  (CP repairs were used if occurring after cut-off age) | CP repair: 27.62, 27.63, 27.64, 27.69 Speech Surgery:  29.4, 29.59 | CP repair:  0CQ30ZZ, 0CQ33ZZ, 0CQ3XZZ, 0CQ20ZZ, 0CQ23ZZ, 0CQ2XZZ, 0CR207Z, 0CR20JZ, 0CR20KZ, 0CR237Z, 0CR23JZ, 0CR23KZ, 0CR2X7Z, 0CR2XJZ, 0CR2XKZ, 0CR307Z, 0CR30JZ, 0CR30KZ, 0CR337Z, 0CR33JZ, 0CR33KZ, 0CR3X7Z, 0CR3XJZ, 0CR3XKZ, 0CS20ZZ, 0CS2XZZ, 0CS30ZZ, 0CS3XZZ, 0CU207Z, 0CU20JZ, 0CU20KZ, 0CU237Z, 0CU23JZ, 0CU23KZ, 0CU2X7Z, 0CU2XJZ, 0CU2XKZ, 0CU307Z, 0CU30JZ, 0CU30KZ, 0CU337Z, 0CU33JZ, 0CU33KZ, 0CU3X7Z, 0CU3XJZ, 0CU3XKZ  Speech Surgery:  0CQM0ZZ, 0CQM3ZZ, 0CQM4ZZ, 0CQM7ZZ, 0CQM8ZZ, 0CRM07Z, 0CRM0JZ, 0CRM0KZ, 0CRM77Z, 0CRM7JZ, 0CRM7KZ, 0CRM87Z, 0CRM8JZ, 0CRM8KZ | CP repair:  42200  Speech Surgery:  42145, 42215, 42220, 42225, 42226, 42227, 42950 |

**CP=Cleft Palate*
